# Supplementary material
Source: Springer Nature journal article supplement (https://www.springermedizin.de/resource/supplementary/12873_2005_27_MOESM7_ESM.pdf/9431830)

# Tube Restraint

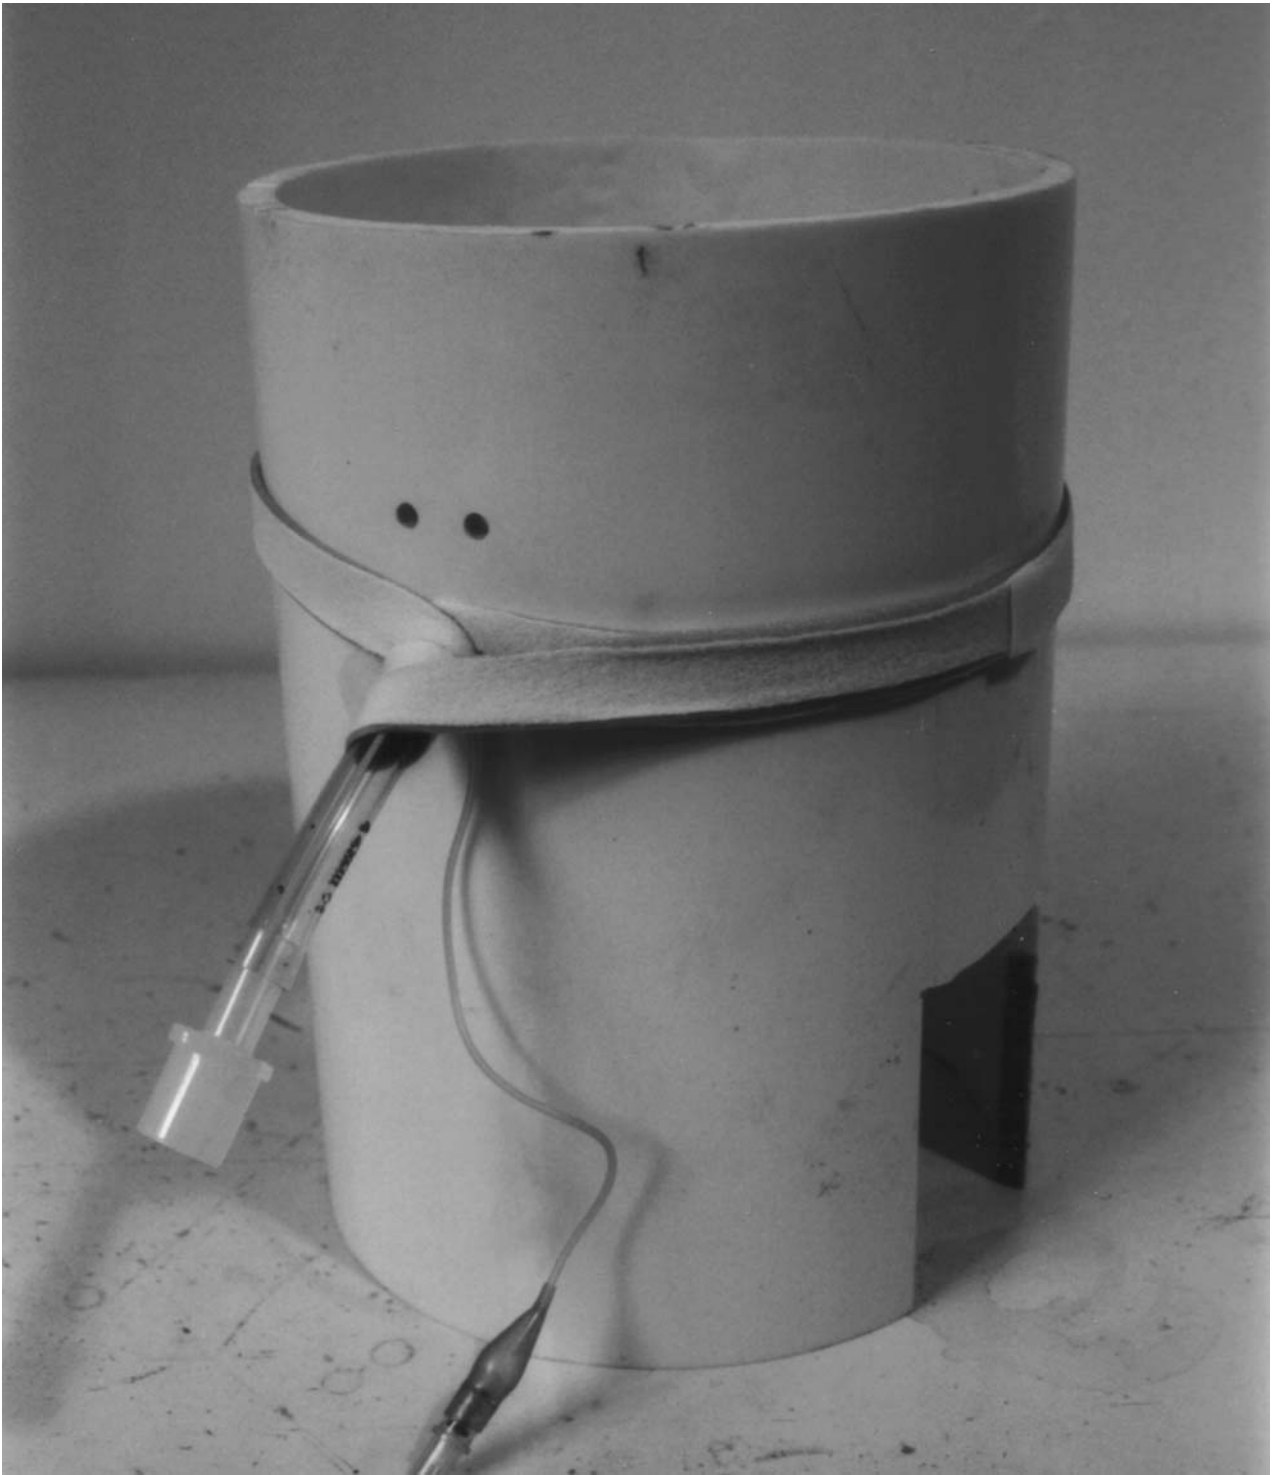

Supplement: MOESM7 [file 9431830]
